# Supplementary material for: Light-mediated one-pot synthesis of an ABC triblock copolymer in aqueous solution via RAFT and the effect of pH on copolymer self-assembly
Source: Royal Society of Chemistry journal article supplement (doi:10.1039/c8py00775f), 2018-01-01
Supplement: c8py00775f1.pdf [file c8py00775f1.pdf]

*Supporting Information*

**Light-Mediated One-pot Synthesis of ABC Triblock Copolymer in Aqueous Solution  
via RAFT and The Effect of pH on the Copolymer Self-Assembly**

Sudhina Guragain<sup>a,\*</sup> and Juan Perez-Mercader<sup>a,b,\*</sup>

<sup>a</sup>Department of Earth and Planetary Sciences and Origins of Life Initiative, Harvard University, Cambridge, Massachusetts, 02138, USA

<sup>b</sup>Santa Fe Institute, Santa Fe, New Mexico 87501, USA

Email: [sudhinag@fas.harvard.edu](mailto:sudhinag@fas.harvard.edu) (S. G.), [jperezmercader@fas.harvard.edu](mailto:jperezmercader@fas.harvard.edu) (J. P.-M.)

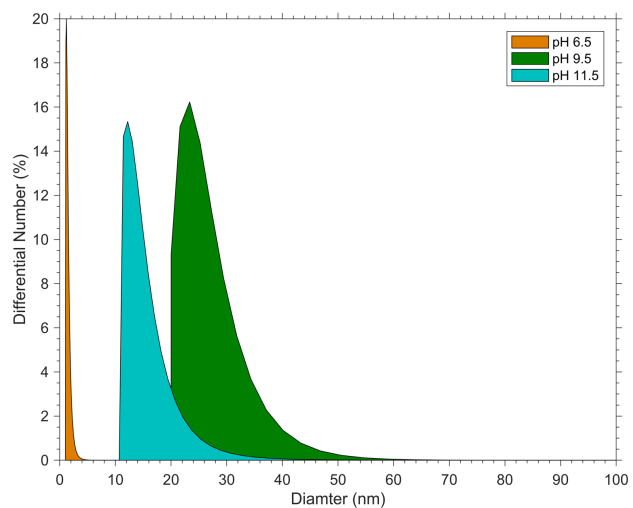

Figure S1. Hydrodynamic diameter of the self-assembled nanostructures of E<sub>17</sub>-D<sub>45</sub> at different pHs.

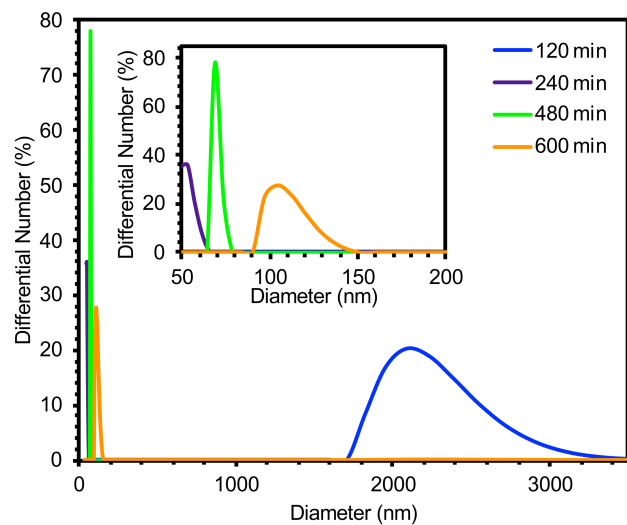

**Figure S2.** Hydrodynamic diameter of E<sub>17</sub>-D<sub>45</sub>-H<sub>x</sub> at different reaction time (increasing hydrophobic chain length) under acidic condition. Inset shows the enlarged plot of the hydrodynamic diameter of nanostructures of size less than 200 nm.

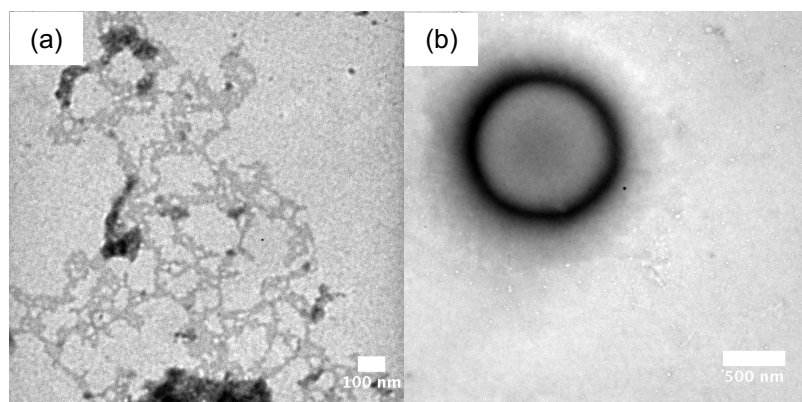

**Figure S3.** TEM images of 0.4 % (w/w) solution of E<sub>17</sub>-D<sub>45</sub>-H<sub>220</sub> at pH  $\cong$  8 at different sample locations in the TEM grid.
